# Supplementary figures and images for: Does physical activity prevent cognitive decline and dementia?: A systematic review and meta-analysis of longitudinal studies
Source: Springer Nature journal article supplement (doi:10.1186/1471-2458-14-510), 2014-05-27

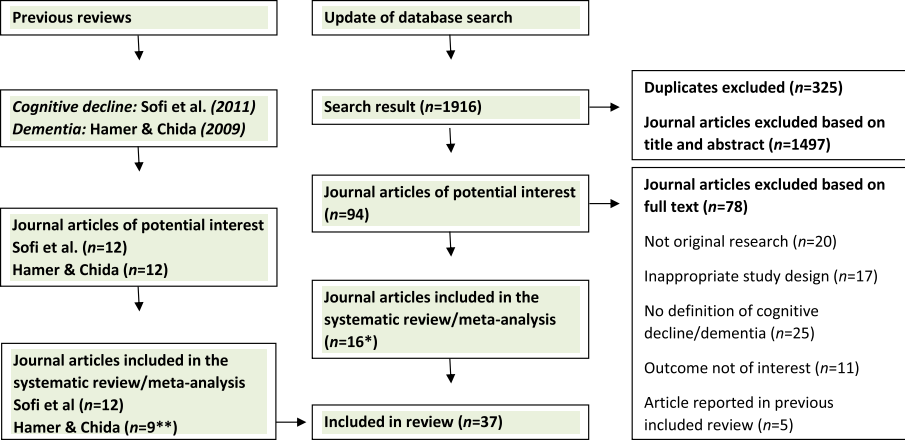

Supplement: 12889_2014_6691_MOESM5_ESM.pdf [file 12889_2014_6691_MOESM5_ESM.pdf]
